# Supplementary material for: Targeting methyltransferase PRMT5 eliminates leukemia stem cells in chronic myelogenous leukemia
Source: JCI journal article supplement (doi:10.1172/jci85239), 2016-09-18
Supplement: sd1 [file 1]

# Supplemental Figure 1

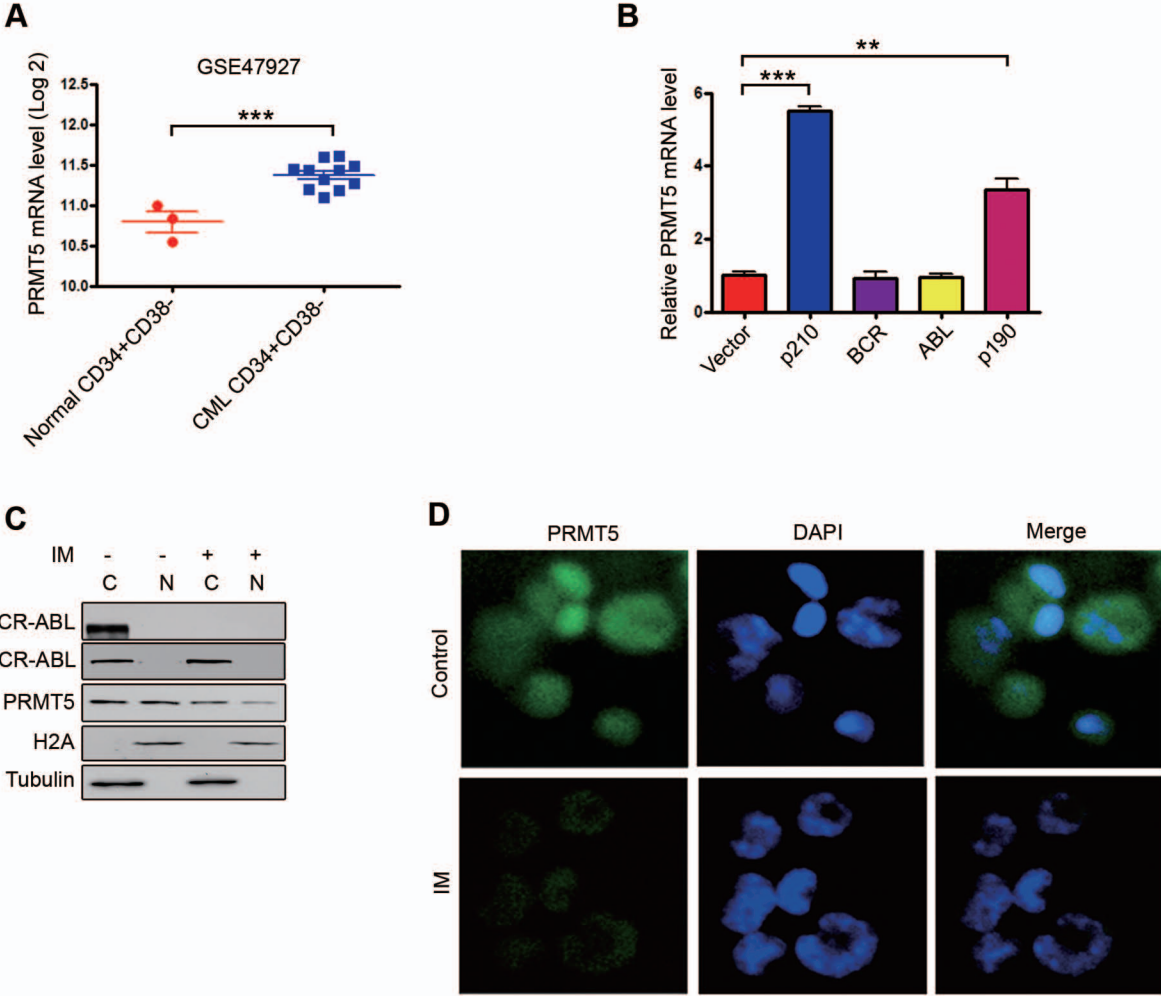

**Supplemental Figure 1. BCR-ABL activates PRMT5 expression in human CD34<sup>+</sup> cells.** Related to Figure 1. (A) PRMT5 was overexpressed in CML CD34<sup>+</sup>CD38<sup>-</sup> cells compared with normal counterparts (GSE47927). \*\*\*  $P < 0.0001$ , 2-tailed Student's *t* test. (B) Fusion *BCR-ABL* gene activated PRMT5 expression at mRNA level. \*\*  $P < 0.01$ , \*\*\*  $P < 0.0001$ , one-way ANOVA, *post-hoc* intergroup comparisons, Tukey's test. (C) Inactivation of BCR-ABL decreased PRMT5 in cytoplasmic and nuclear compartments. Tubulin and H2A were indicators of cytoplasmic and nuclear extractions, respectively. (D) K562 cells were treated with IM (1.0  $\mu$ M) for 24 hr, then underwent immunofluorescent analysis with anti-PRMT5. Nuclei were stained with DAPI.

## Supplemental Figure 2

**A**

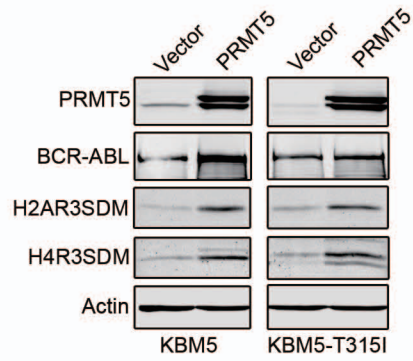

**B**

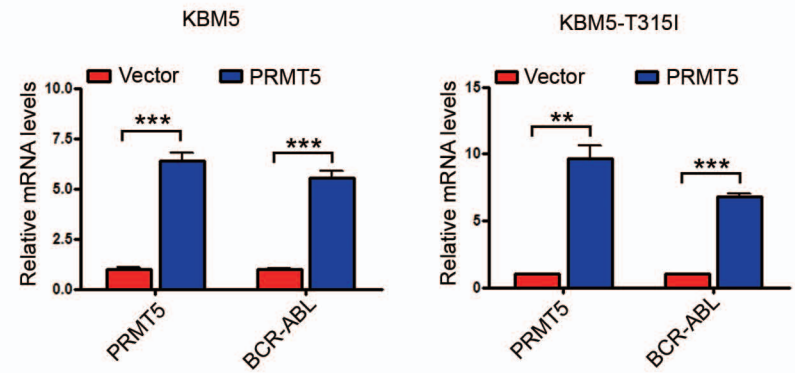

**C**

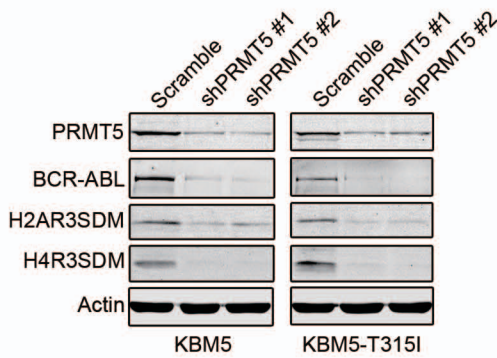

**D**

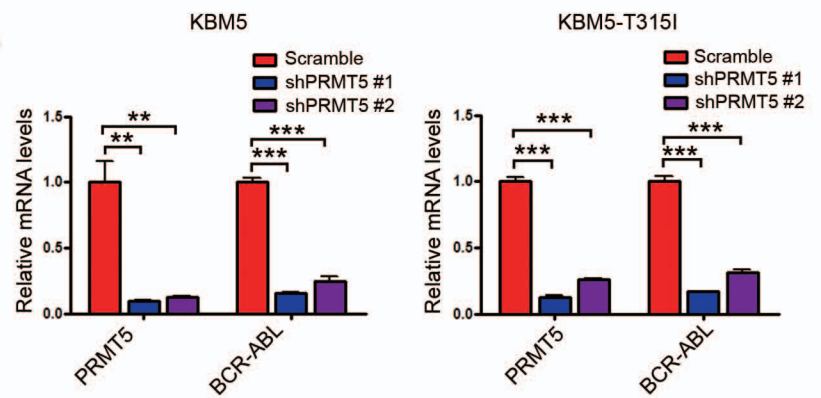

**E**

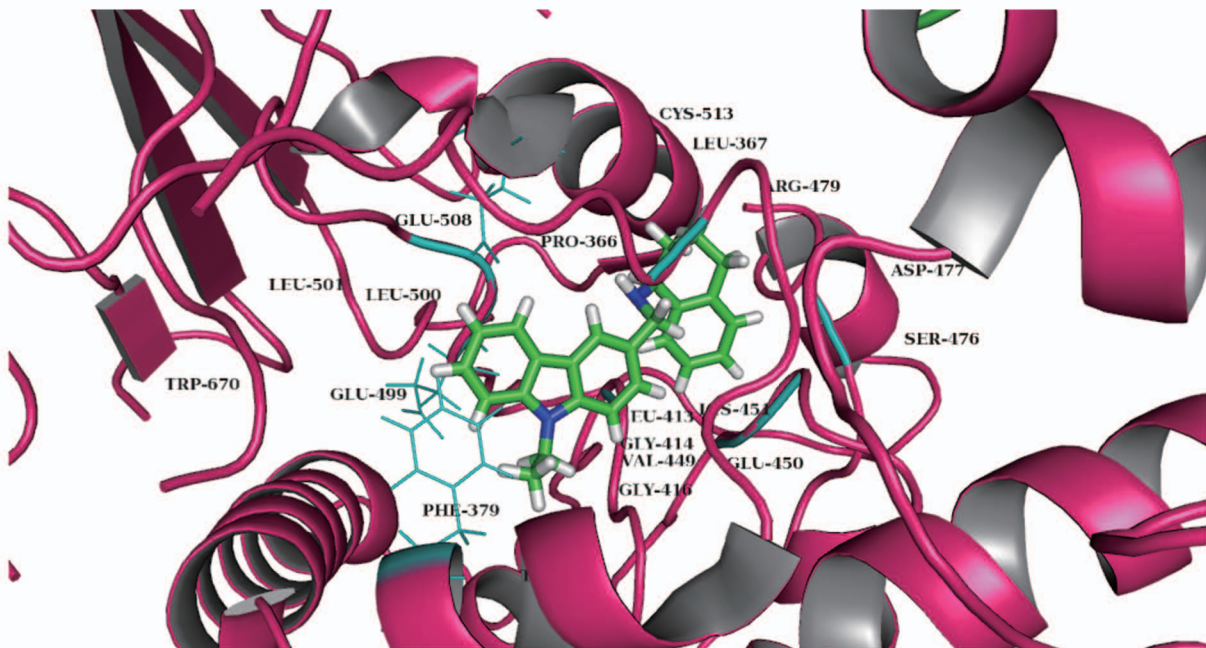

**Supplemental Figure 2. PRMT5 positively regulates BCR-ABL expression in CML cells.** Related to Figure 2. (A and C) Forty-eight hr after KBM5 or KBM5-T315I cells were electrotransfection with pCMV-2B-Flag (vector) or pCMV-2B-Flag-PRMT5 (PRMT5) constructs (A), or 48 hr after two rounds of transduction with control shRNA (Scramble), shPRMT5 #1, or shPRMT5 #2 lentivirus (C), the protein levels of BCR-ABL and PRMT5 and its histone methylation marks (H2AR3SDM and H4R3SDM) were determined by Western blot analysis. (B and D) Twenty-four hr after KBM5 or KBM5-T315I cells were electrotransfection with pCMV-2B-Flag (vector) or pCMV-2B-Flag-PRMT5 (PRMT5) constructs (B), or 24 hr after two rounds of transduction with control shRNA (Scramble), shPRMT5 #1, or shPRMT5 #2 lentivirus (D), the mRNA levels of *BCR-ABL* and *PRMT5* were determined by qRT-PCR analysis. 2-tailed Student's *t* test was used for B; one-way ANOVA, *post-hoc* intergroup comparisons, Tukey's test was performed for D. \*\*  $P < 0.01$ , \*\*\*  $P < 0.0001$ . (E) Molecular docking studies of PJ-68 and PRMT5. Docked conformation of PJ-68 in the active site of PRMT5 (3 Å surround the binding pocket). The docking between PJ-68 and predicted pocket (in blue cartoons) of PRMT5. The residues labeled in cartoons may form electronic/hydrophobic/aromatic stacking interactions with PJ-68.



# Supplemental Figure 3

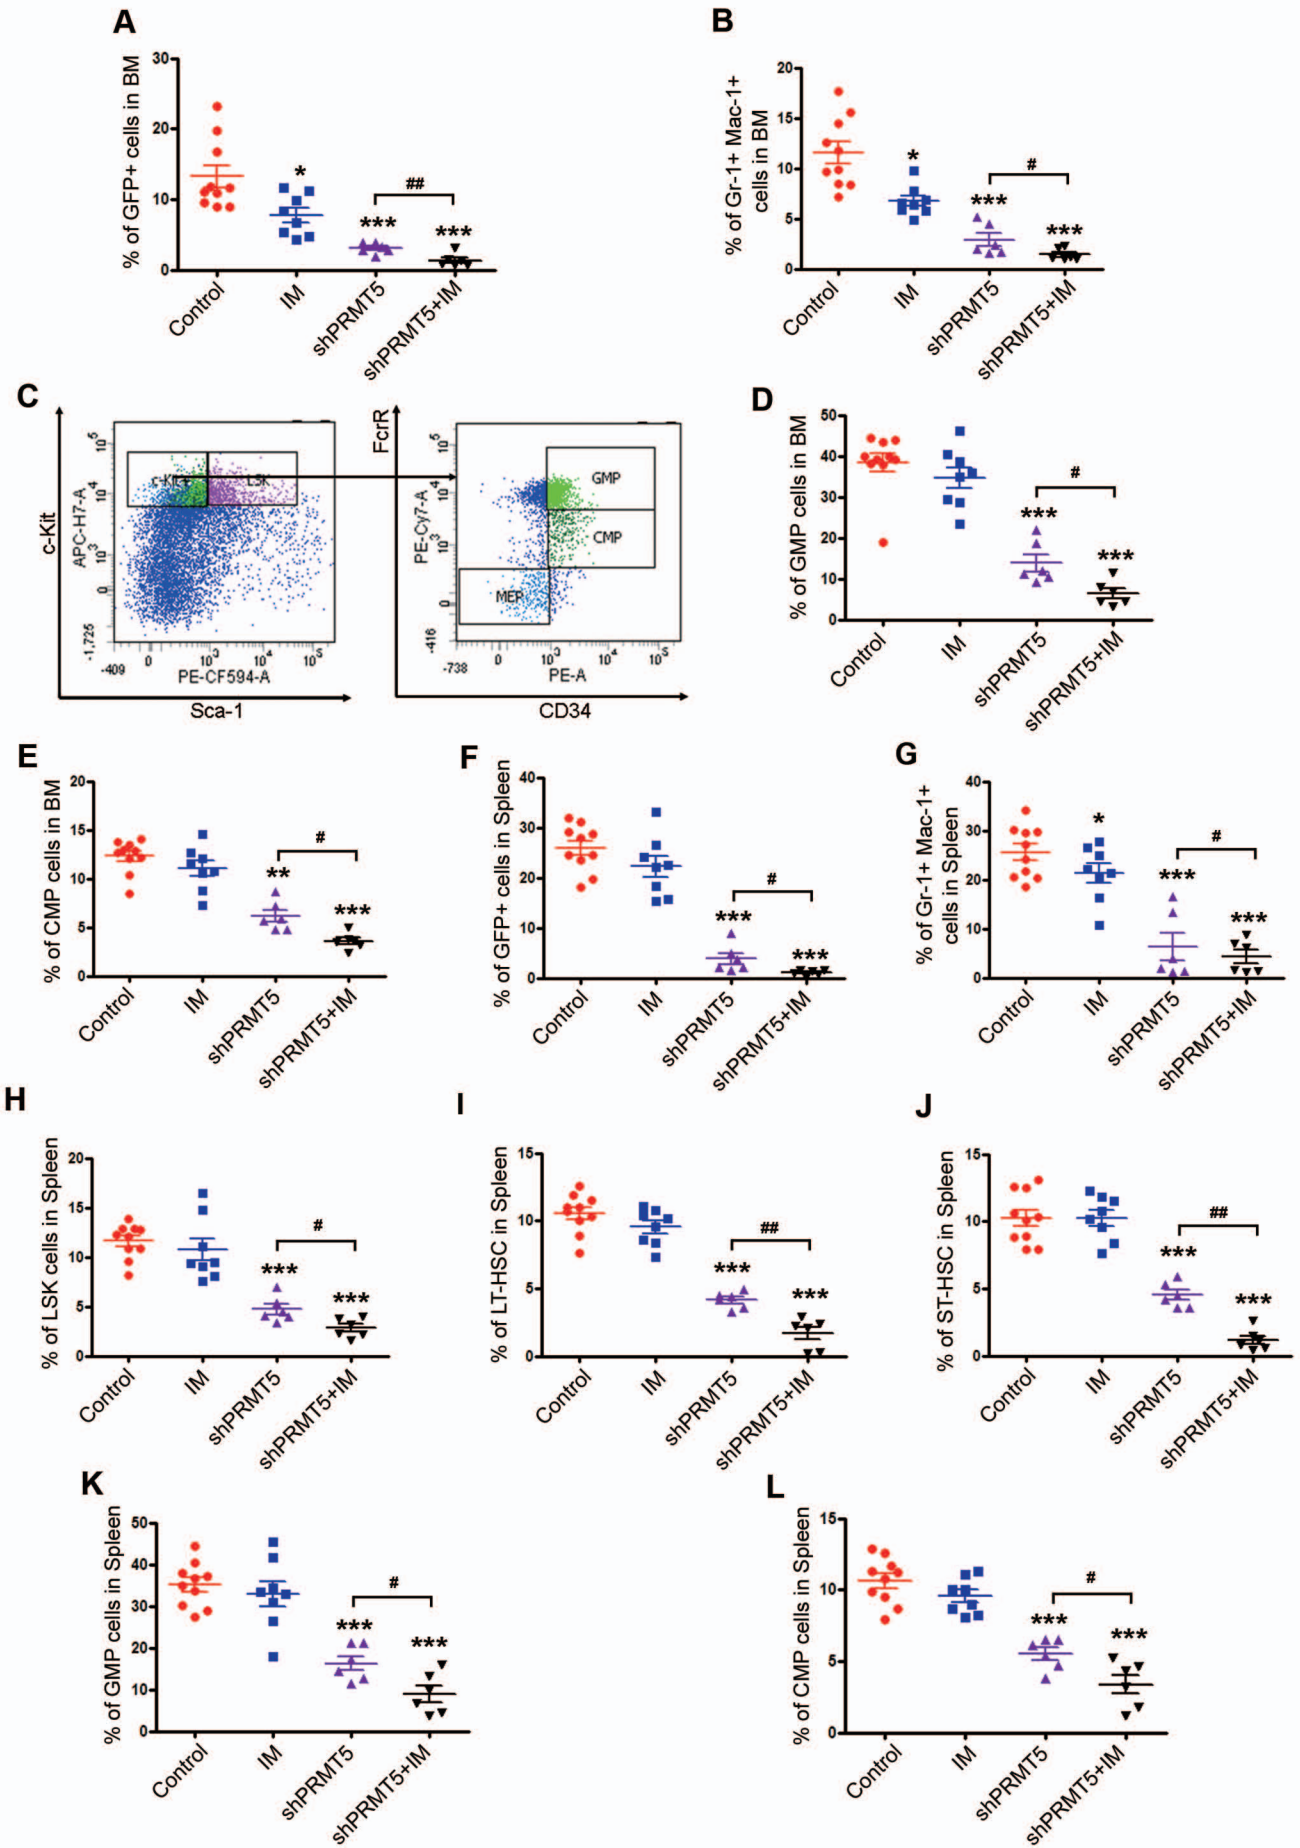

**Supplemental Figure 3. *PRMT5* knockdown inhibits LSCs growth in the CML mouse model.** Related to Figure 4. (A) Percentage of GFP<sup>+</sup> cells (leukemia cells) in BM. (B) Percentage of GFP<sup>+</sup> myeloid cells (Gr-1<sup>+</sup> Mac-1<sup>+</sup>) in BM. (C) Schema for analysis of GMP and CMP in BM cells of CML mice. (D) GMP cell proportion in BM. (E) CMP cell proportion in BM. (F) Percentage of GFP<sup>+</sup> cells (leukemia cells) in the spleens of CML mice. (G) Percentage of GFP<sup>+</sup> myeloid cells (Gr-1<sup>+</sup> Mac-1<sup>+</sup>) in the spleens of CML mice. (H-J) Analysis of LSKs in the spleen cells of CML mice received treatment with shPRMT5 ± IM. Control (n=10), IM (n=8), shPRMT5 (n=6), shPRMT5+IM (n=6). Results for the GFP<sup>+</sup> population in spleen: LSK cells (H), LT-HSCs (I), and ST-HSCs (J). (K) GMP cell proportion in spleen. (L) CMP cell proportion in spleen. \*  $P < 0.05$ , \*\*\*  $P < 0.0001$ , compared with control; #  $P < 0.05$ , ##  $P < 0.01$ , shPRMT5 compared with shPRMT5+IM, one-way ANOVA, *post-hoc* intergroup comparisons, Tukey's test.

# Supplemental Figure 4

**A**

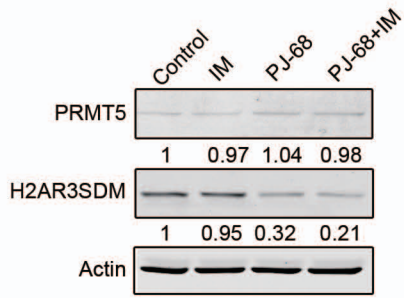

**B**

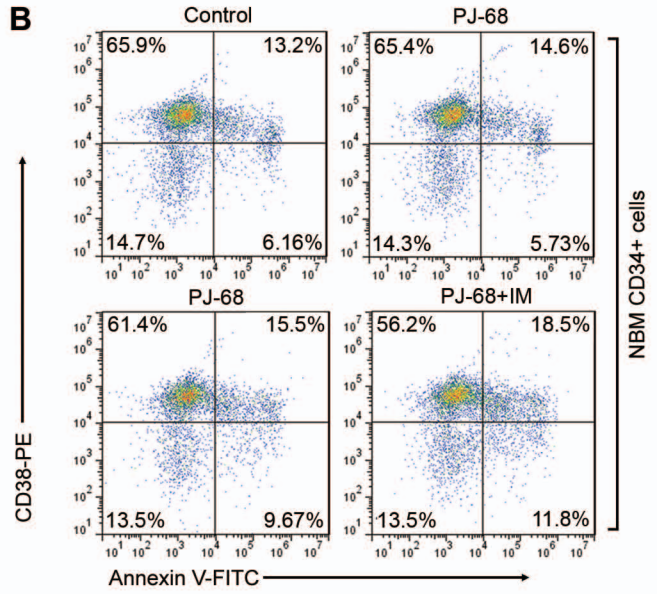

**C**

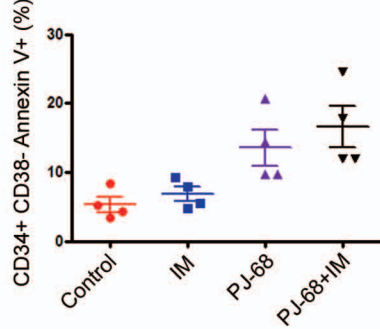

**D**

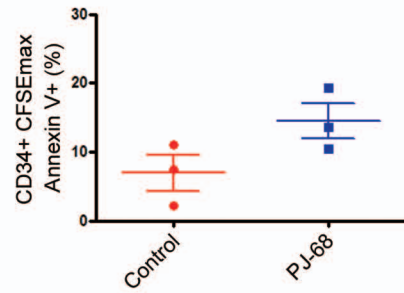

**E**

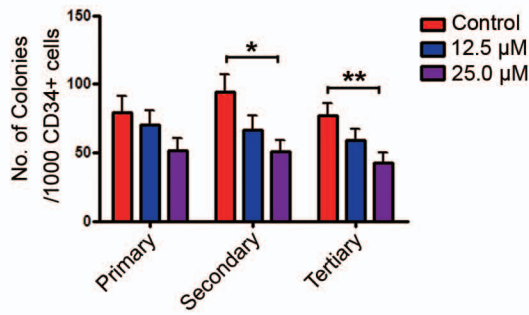

**F**

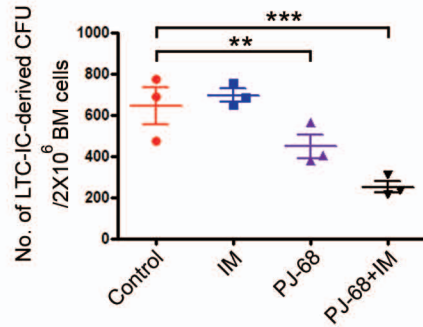

**Supplemental Figure 4. Pharmacological inhibition of PRMT5 activity has minimal effect on self-renewal capacity of human NBM CD34<sup>+</sup> cells.** Related to Figure 5. (A) Human NBM CD34<sup>+</sup> cells (n=3) were treated with PJ-68 alone or in combination with IM for 24 hr; Western blot analysis of protein levels of PRMT5 and its specific substrate H2AR3SDM. (B) Representative flow cytometry plots for apoptosis in human NBM CD34<sup>+</sup> cells. (C) NBM CD34<sup>+</sup> cells (n=4) were treated with PJ-68 alone or with IM (2.5 μM) for 24 hr, apoptosis was analyzed by flow cytometry after staining with Annexin V-FITC and anti-CD38-PE. (D) Pharmacological inhibition of PRMT5 activity did not induce apoptosis in quiescent NBM CD34<sup>+</sup> cells. Human NBM CD34<sup>+</sup> cells (n=3) were labeled with CFSE, then cultured with PJ-68 for 96 hr, apoptotic cells were analyzed by flow cytometry after labeling with Annexin V-PE. (E) Pharmacological inhibition of PRMT5 activity exhibited minimal effect on the serial replating capacity of NBM LSCs. Human NBM CD34<sup>+</sup> cells (n=3) were treated with concentrations of PJ-68 for 24 hr, washed with PBS and counted; 1,000 cells were plated in methylcellulose medium. Colonies were counted on day 14. The cells were then harvested and 1,000 cells were re-plated for the second and third rounds, and colonies were counted on day 14 after each round. (F) Pharmacological inhibition of PRMT5 activity lessened the LTC-IC capacity of NBM LSCs. Human NBM cells (n=3) (2×10<sup>6</sup>) were seeded in LTC-IC medium onto irradiated M2-10B4 cells and treated with PJ-68 (25.0 μM) with or without IM (2.5 μM) for 1 week, and cells were cultured for 5 more weeks in LTC-IC medium with weekly half drug-free-medium changes. After 6 weeks, cells were harvested and plated into MethoCult H4435. LTC-IC-derived colonies were counted after 14 days. \* *P*<0.05, \*\* *P*<0.01, \*\*\* *P*<0.0001, one-way ANOVA, *post-hoc* intergroup comparisons, Tukey's test.

# Supplemental Figure 5

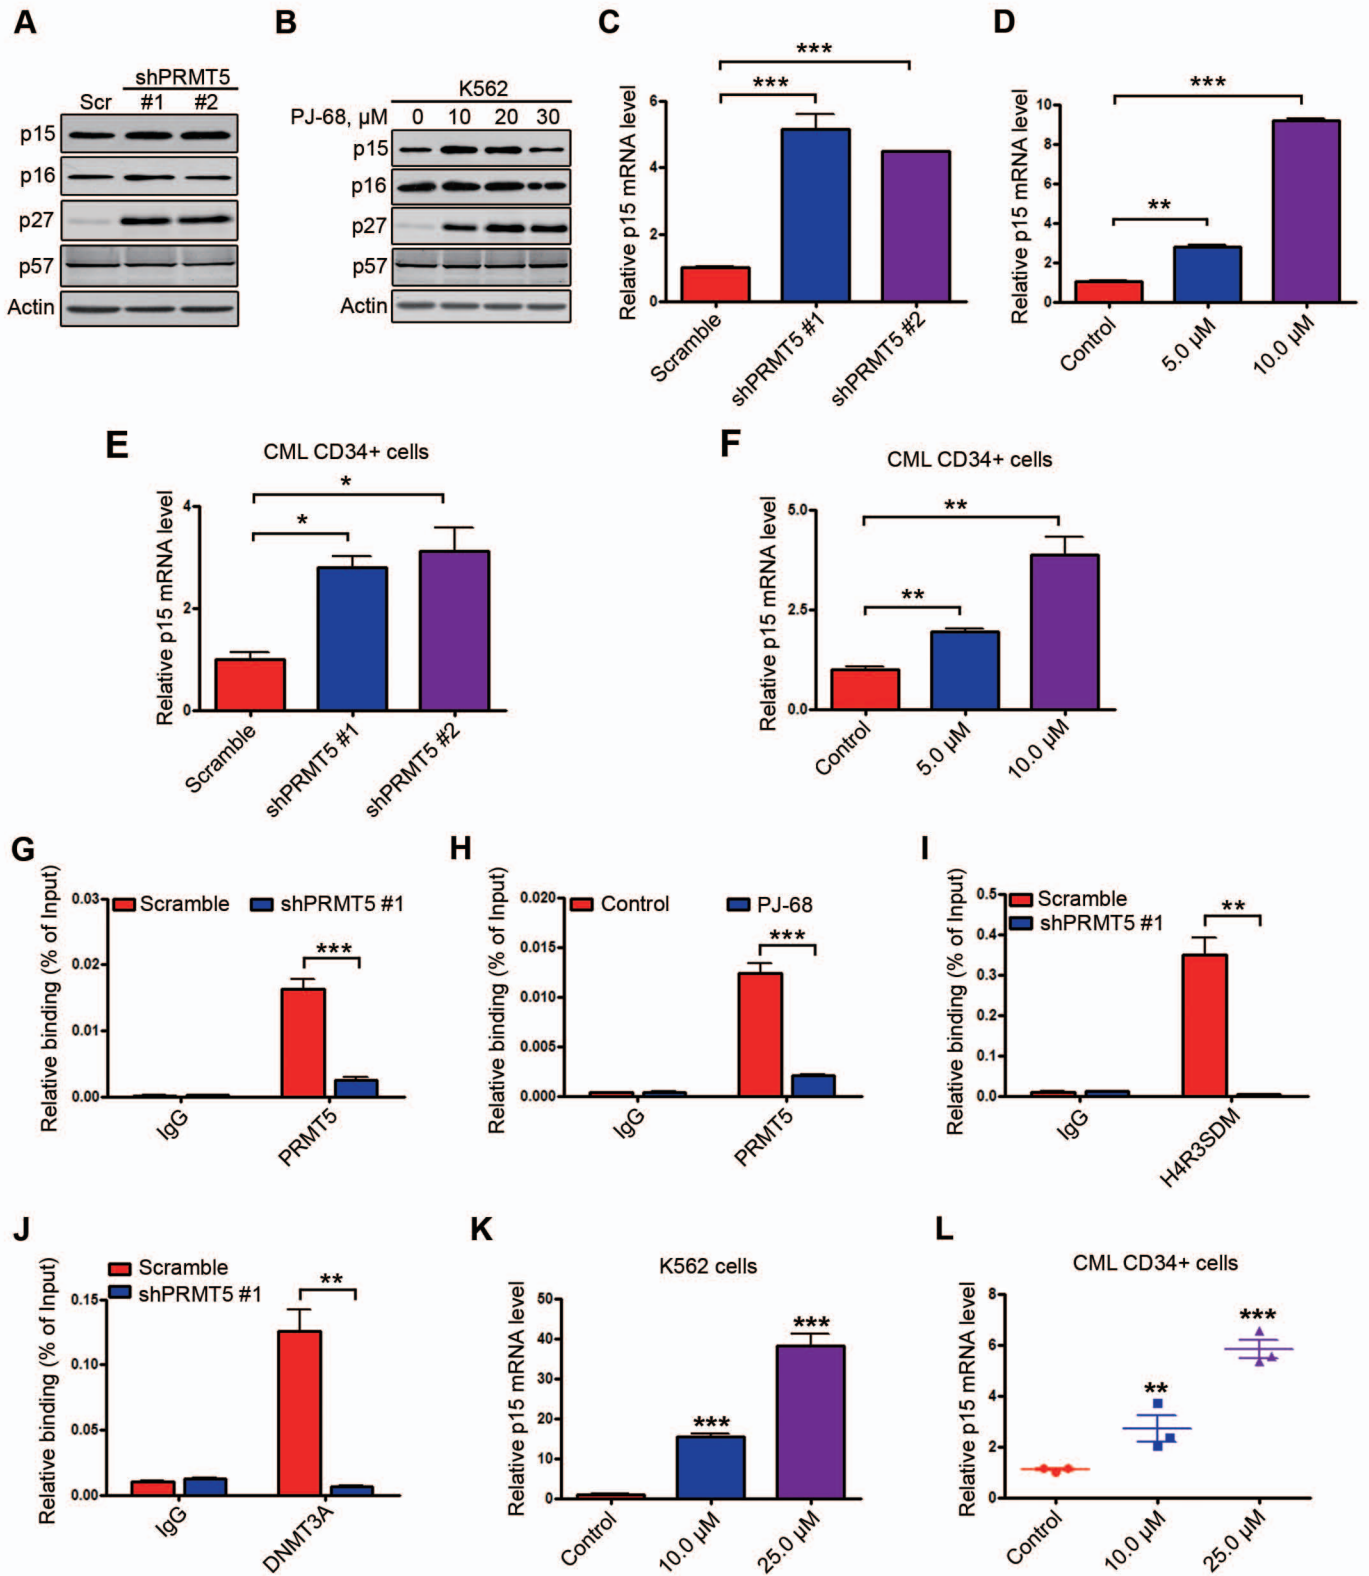

**Supplemental Figure 5. PRMT5 modulates the expression of cell cycle regulators in CML CD34<sup>+</sup> cells.** (A and B) Knockdown of *PRMT5* or pharmacological inhibition of PRMT5 activity by small-molecule inhibitor PJ-68 increased p15<sup>INK4B</sup> and p27<sup>KIP1</sup> but not p16<sup>INK4A</sup> and p57<sup>KIP2</sup> expression. Cell lysates were from stable knockdown K562 cells with Scr (Scramble), shPRMT5 #1 and shPRMT5 #2, or K562 cells incubated with PJ-68 for 24 hr. Western blot analysis of the protein level of p15<sup>INK4B</sup>, p16<sup>INK4A</sup>, p27<sup>KIP1</sup>, and p57<sup>KIP2</sup>. (C and D) qRT-PCR analysis of mRNA level of *p15<sup>INK4B</sup>* in K562 cells transduced with lentiviral shRNA against *PRMT5* (C) or with pharmacological inhibition of PRMT5 activity (D). (E and F) qRT-PCR analysis of mRNA level of *p15<sup>INK4B</sup>* in CML CD34<sup>+</sup> cells transduced with lentiviral shRNA against *PRMT5* (E) or with pharmacological inhibition of PRMT5 activity (F). (G and H) *PRMT5* knockdown or inhibition led to loss of recruitment of PRMT5 on the *p15<sup>INK4B</sup>* promoter. (I and J) *PRMT5* knockdown inhibited the enrichment of H4R3SDM (I) and DNMT3A (J) at the promoter of *p15<sup>INK4B</sup>* as detected by ChIP assay in *PRMT5* knockdown K562 cells. Scramble shRNA was a control. (K and L) DNMT3A inhibition in CML cells upregulated *p15<sup>INK4B</sup>* expression. K562 cells (K) and CML CD34<sup>+</sup> cells (n=3) (L) were treated with the indicated DNMT3A inhibitor for 24 hr, and *p15<sup>INK4B</sup>* mRNA level was examined by qRT-PCR analysis. 2-tailed Student's *t* test was performed for G, H, I and J; one-way ANOVA, *post-hoc* intergroup comparisons, Tukey's test was used for C, D, E, F, K and L. \* *P*<0.05, \*\* *P*<0.01, \*\*\* *P*<0.0001.



# Supplemental Figure 6

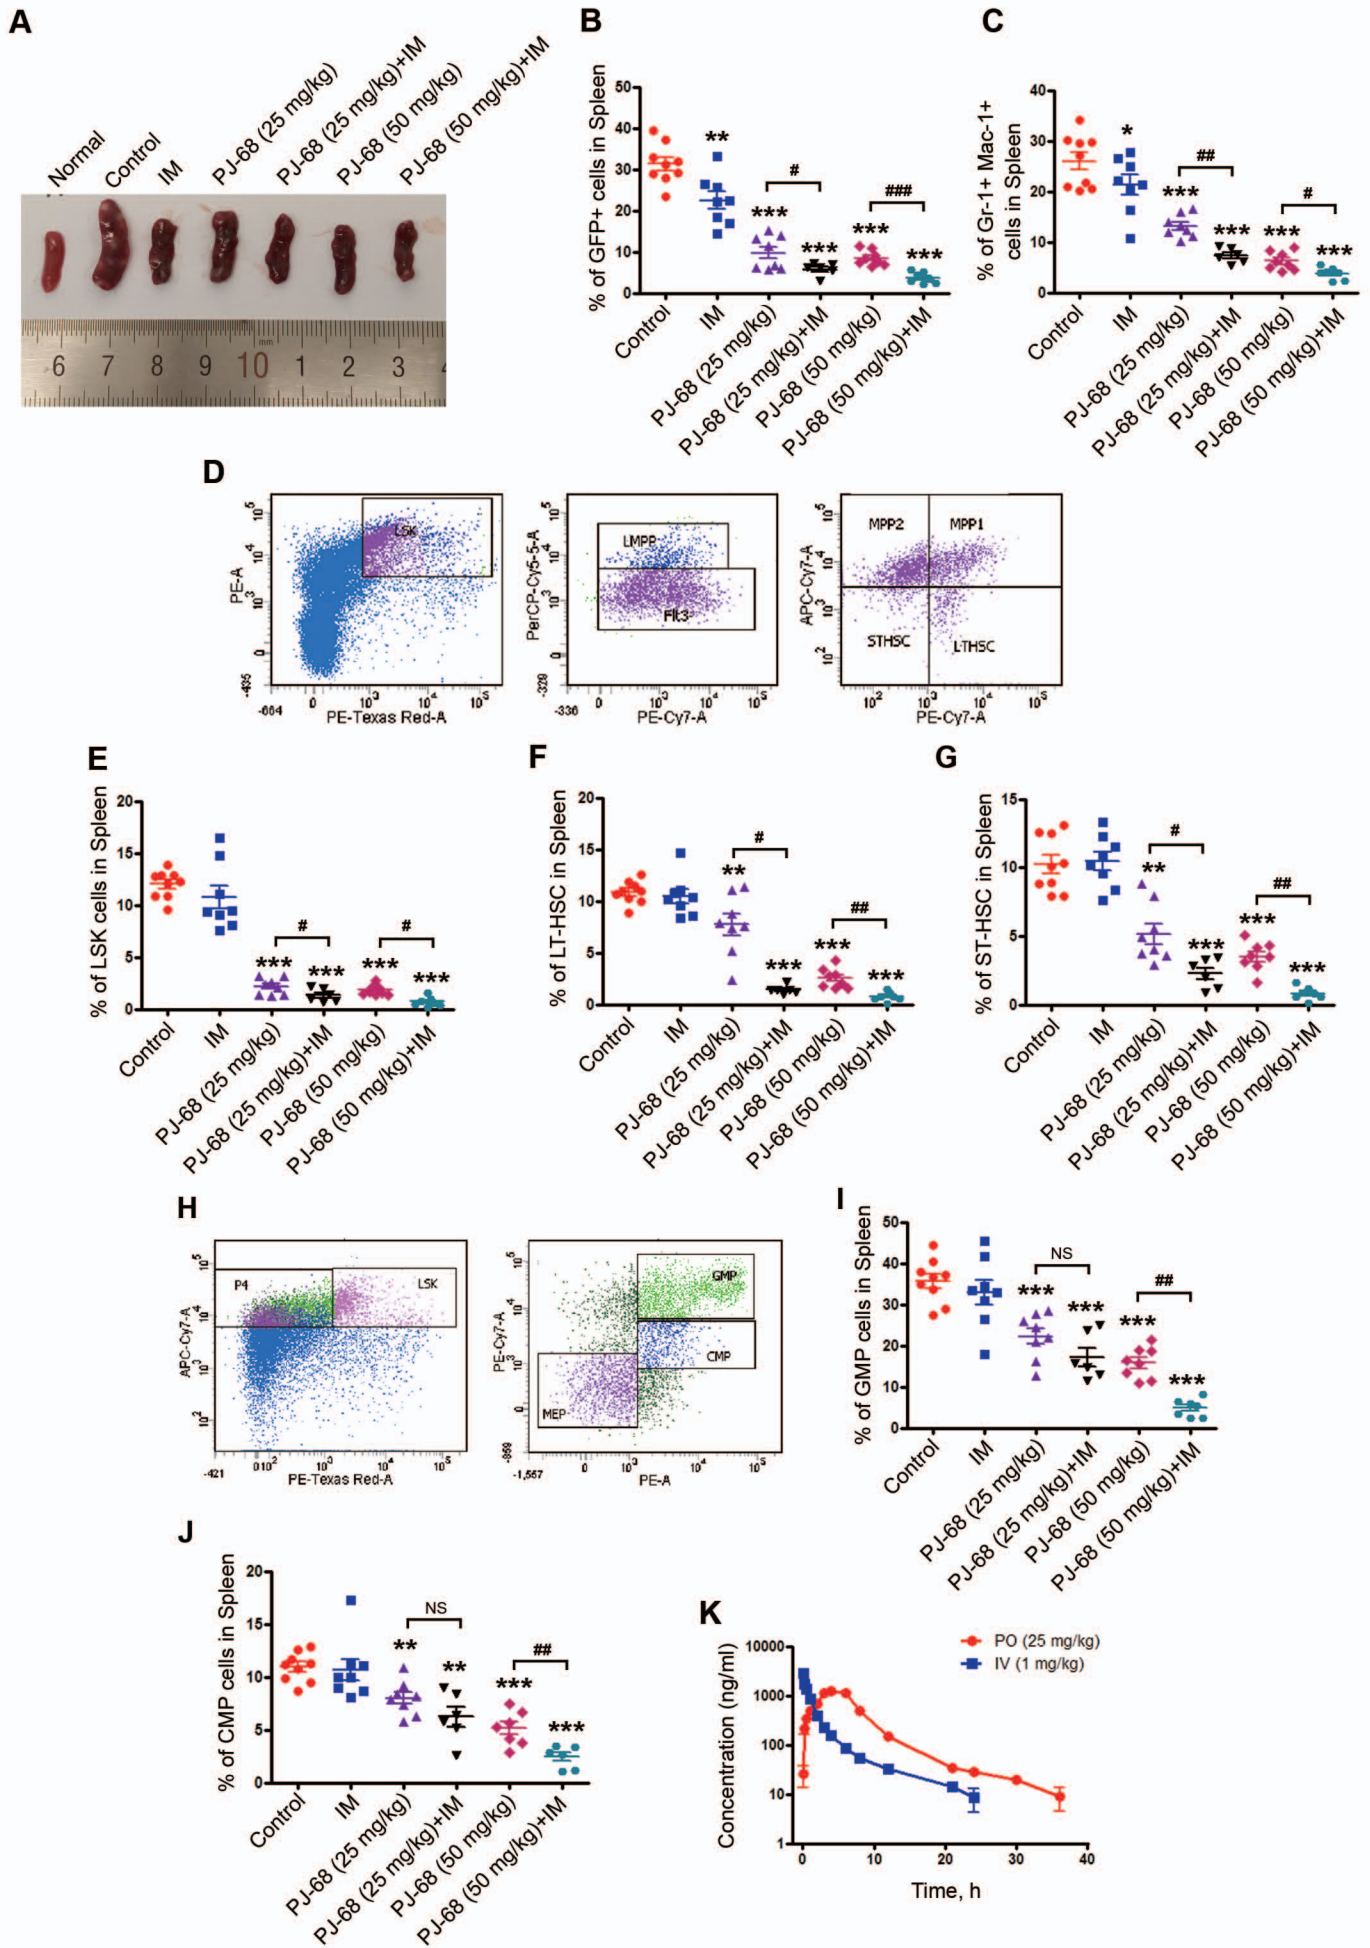



**Supplemental Figure 6. Pharmacological inhibition of PRMT5 activity reduces growth of CML stem cells in mice.** Related to Figure 6. CML mice were treated with PJ-68 (25 mg/kg/day and 50 mg/kg/day, i.p., respectively) with or without IM (100 mg/kg/day, p.o.) for 2 weeks; mice were euthanized, and bulk leukemia cells and stem/progenitor cells in spleens were analyzed by flow cytometry. **(A)** A representative photograph of spleens from each group. **(B)** GFP<sup>+</sup> (leukemia) cells and **(C)** GFP<sup>+</sup> myeloid cells (Gr-1<sup>+</sup> Mac-1<sup>+</sup>) cells in the spleen. **(D)** Schema for analysis of LSKs, LT-HSCs, and ST-HSCs. Results for the GFP<sup>+</sup> population in the spleen were shown: LSK cells **(E)**, LT-HSCs **(F)**, and ST-HSCs **(G)**. **(H)** Schema for analysis of GMP and CMP in spleen cells of CML mice. **(I)** GMP cells and **(J)** CMP cells in the spleen. Control (n=9), IM (n=8), PJ-68 (25 mg/kg) (n=8), PJ-68 (25 mg/kg)+IM (n=6), PJ-68 (50 mg/kg) (n=8), PJ-68 (50 mg/kg)+IM (n=7). \*  $P < 0.05$ , \*\*  $P < 0.01$ , \*\*\*  $P < 0.0001$ , compared with control; NS: not significant, #  $P < 0.05$ , ##  $P < 0.01$ , ###  $P < 0.0001$ , PJ-68 compared with PJ-68+IM, one-way ANOVA, *post-hoc* intergroup comparisons, Tukey's test. **(K)** Pharmacokinetics of PJ-68 in SD rats. The plot of PJ-68 plasma concentration *versus* time in SD rats (n=3, each), following single oral gavage administration and intravenous injection was shown.

# Supplemental Figure 7

**A**

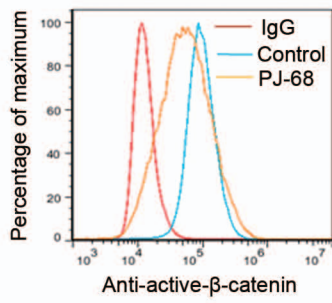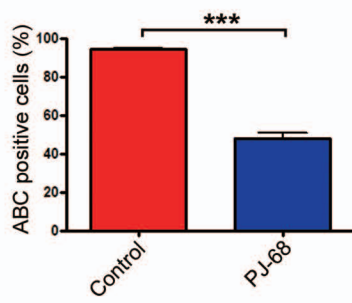

**B**

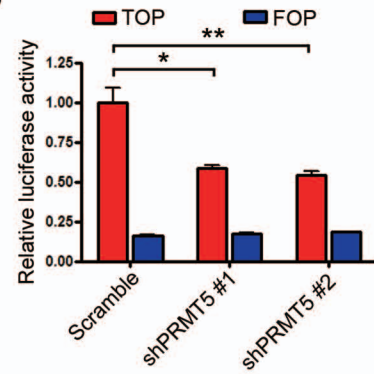

**C**

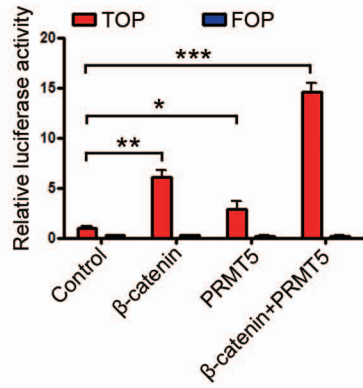

**D**

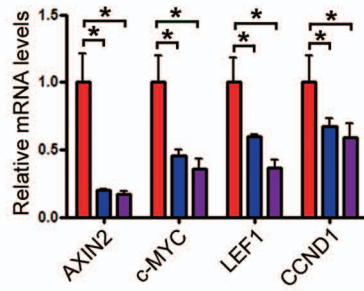

**E**

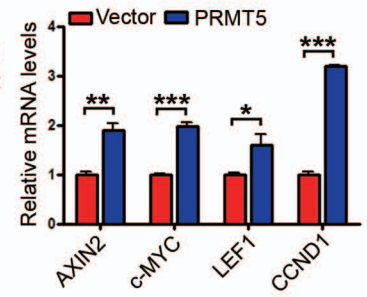

**F**

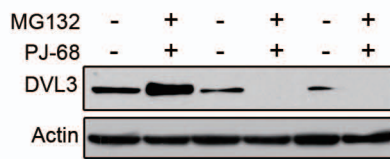

**G**

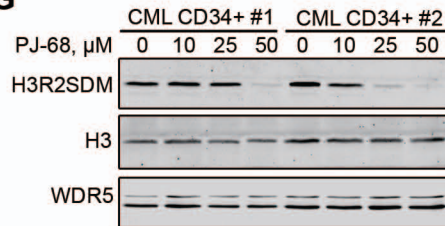

**Supplemental Figure 7. PRMT5 activates Wnt/ $\beta$ -catenin signaling through DVL3 in human CML CD34<sup>+</sup> cells.** Related to Figure 9. (A) Pharmacological abrogation of PRMT5 activity decreased active intracellular  $\beta$ -catenin levels in CML cells. Flow cytometry of activated intracellular  $\beta$ -catenin levels in K562 cells after labeled with anti-active- $\beta$ -catenin (ABC) antibody. A representative flow cytometry plot (left) and bar plots (right) were shown. (B) *PRMT5* knockdown elicited TCF4/LEF1-dependent luciferase activity in K562 cells. (C) PRMT5 activated TCF/LEF-dependent luciferase activity. (D) *PRMT5* knockdown decreased the mRNA levels of Wnt targets genes. (E) *PRMT5* overexpression increased the mRNA levels of Wnt targets genes. \*  $P < 0.05$ , one-way ANOVA, *post-hoc* intergroup comparisons, Tukey's test. (F) Inhibition of ubiquitin-proteasome degradation pathway by MG132 did not rescue PJ-68-mediated inhibition of DVL3. (G) *PRMT5* knockdown or inhibition reduced level of H3R2SDM determined by Western blot analysis in CML CD34<sup>+</sup> cells (n=2). \*  $P < 0.05$ , \*\*  $P < 0.01$ , \*\*\*  $P < 0.0001$ , 2-tailed Student's *t* test.

## **Supplemental methods**

### *Molecular docking studies of PJ-68 and PRMT5*

Molecular docking was performed using Surflex-Dock (SYBYL®8.1 molecular modeling software) (1). Crystal structure of PRMT5 was retrieved from RCSB Protein Data Bank (PDB entry code: 3UA3). Half of 3UA3 was removed for clarity since it was reported as a homodimer. Molecule was sketched and minimized using Powell optimization in the presence of the Tripos force field with a convergence criterion of 0.001 kcal/mol Å and then assigned with the Gasteiger–Hückel charges. Automatic docking was employed. Other parameters were established by default in software.

### *Immunoprecipitation*

Cells were harvested in Triton/glycerol lysis buffer (1% Triton X-100, 10% glycerol, 150 mM NaCl, 20 mM Tris (pH 7.5), 2 mM EDTA, 1 mM PMSF, 10 µg/ml aprotinin and 10 µg/ml leupeptin, 0.5 µM NaF, and 10 µM β-glycerophosphate) and protein concentration was determined by the BCA assay. After incubating with antibody at 4°C overnight, β-catenin and TCF4 proteins were precipitated using protein A/G agarose (Santa Cruz Biotechnology, Santa Cruz, CA). Precipitated proteins were eluted by 100 mM glycine (pH=3.0), and resolved by SDS-PAGE (2).

### *NSI mice*

We generated the new strain of immunodeficient mice (NOD-scid-IL2Rg<sup>-/-</sup>) designated NSI by injecting IL2Rg<sup>-/-</sup> TALENs mRNA pair into the cytoplasm of

pronuclear-stage embryos in the NOD/SCID mice (3). Briefly, female NOD/SCID mice (6-8 weeks of age, Vital River Laboratory Animal Technology Co. Beijing, China) were superovulated by intraperitoneal injection with 5 U of gonadotropin from pregnant mares' serum (PMSG) (cat# G4877-2000IU, Sigma-Aldrich, Shanghai, China) per mouse, followed by injection of 5 U human chorionic gonadotropin (HCG) (cat# CG10-1VL, Sigma-Aldrich, Shanghai, China) 48 hr later. After setting up mating pairs consisting of one superovulated female and one male per cage for overnight, the mating female mice were checked for the presence of vaginal plugs next morning. TALEN-encoding mRNA targeted to *Il2rg* (25 ng/ $\mu$ l) was then microinjected into the cytoplasm of pronuclear-stage embryos. Surviving embryos were surgically implanted into the oviducts of surrogate ICR female mice (Guangzhou Institutes of Biomedicine and Health, Chinese Academy of Sciences, Guangzhou, China). The offsprings were analyzed for knocking-out of *Il2rg* gene. All mice were bred and maintained in specific pathogen-free (SPF)-grade cages and provided with autoclaved food and water. The phenotypes of NSI mice exhibited deficiency of T, B, and NK cells in the peripheral blood, spleen, and bone marrow, which were similar with the phenotypes of NSG mice.

#### *Site-directed mutagenesis*

A catalytically dead PRMT5 mutant construct pCMV-2B-Flag-PRMT5 (R368A) was created using the TaKaRa MutanBEST Kit (Takara Biomedical Technology, Beijing, China) according to the manufacturer's instructions. Briefly, two

complimentary oligonucleotides containing the desired mutation were synthesized, PCR reactions were performed. The blunting kination enzyme mix was added to PCR products. The transformation was performed using the DH5 $\alpha$  competent cells. The mutated PRMT5 construct was used for transfection. The mutation was performed using the following primers: Forward, 5'-CAGGAgccGGACCCCTGGTGAACGCTTC-3', Reverse, 5'-CTCCCAGCACCATCAGTACCT-3'.

#### *Lentiviral transduction of K562 cells*

K562 cells ( $5 \times 10^5$  cells/ml) were infected by spinoculation (1,500 g, 90 min, 32°C) with virus-containing supernatants two rounds in the presence of 8  $\mu$ g/ml polybrene (Sigma-Aldrich, Shanghai, China). Stable cell lines were established after 1  $\mu$ g/ml puromycin selection for 3 weeks.

#### *Establishment of K562 cells stably expressing PRMT5*

K562 cells were electrotransfected with pCMV-2B-Flag-PRMT5 construct, then treated with G418 (400  $\mu$ g/ml) for 2 weeks; single clones (#16 and #19) stably expressing PRMT5 were selected by limiting dilution.

#### *Generating the BCR-ABL-promoter luciferase construct*

A 1,000-bp fragment 5' upstream from BCR-ABL gene transcription start was amplified by PCR with BCR-ABL promoter primers, then subjected to double

digestion with Xho I and Hind III restriction enzymes and ligated into pGL3-Basic firefly luciferase reporter vector (Promega, Shanghai, China) to obtain the BCR-ABL-promoter-pGL3 reporter construct. Sequence of the BCR-ABL-promoter-pGL3 construct was confirmed by double restriction digestion analysis and sequencing. The PCR product was cloned into the pGL3-basic vector and the insert was verified by sequencing.

#### *MiR-203 expression assay*

Human miR-203 and internal control U6 snRNA were purchased from Life Technologies (Shanghai, China), miR-203 gene was amplified by qPCR according to the manufacturer's instructions (4).

#### *In vitro histone methyltransferase activity assay*

The recombinant human PRMTs and substrate were obtained from BPS Bioscience (San Diego, CA). The PRMT enzymatic reactions were conducted in duplicate at room temperature for 60 min in 50  $\mu$ l containing methyltransferase assay buffer, S-adenosylmethionine, enzyme, and compound PJ-68. The reactions were carried out in a substrate pre-coated plate. The final DMSO concentration is 1%. After enzymatic reactions, the reaction mixtures were discarded and the wells was washed three times with TBST buffer, and slowly shaken with blocking buffer for 10 min. Then 100  $\mu$ l of diluted primary antibody was added. The plate was slowly shaken for 60 min, washed three times, and shaken with blocking buffer for 10 min.



Then 100  $\mu$ l of diluted secondary antibody was added. The plate was slowly shaken for 30 min, washed three times, and shaken with blocking buffer for 10 min. A mixture of the HRP chemiluminescent substrates was freshly prepared and added. The luminescence of the samples was measured in a microplate reader immediately. The luminescence data were analyzed and compared. In the absence of the compound, the intensity ( $C_e$ ) was defined as 100% activity. In the absence of enzyme, the intensity ( $C_0$ ) was defined as 0% activity. The percent activity in the presence of compound was calculated according to the following equation: % activity =  $(C-C_0)/(C_e-C_0)$ , where C= the luminescence in the presence of the compound. The concentration for 50% inhibition of enzymatic activity ( $IC_{50}$ ) was calculated with normalized dose–response fit using GraphPad 5.0 software.

#### *Pharmacokinetic study*

Male Sprague–Dawley (SD) rats (n=6) (Vital River Laboratory Animal Technology Co. Beijing, China), weight 200-250 g, were randomly separated in two groups. PJ-68 were dissolved in DMSO (10%), Cremaphor EL (18%) and 5% dextrose (72%). The rats were given PJ-68 either by intravenous infusion (1.0 mg/kg) or oral gavage (25 mg/kg) for pharmacokinetic study. Peripheral blood samples (approximately 0.2 ml/sample) were collected from each animal via the jugular vein at 5, 15, 30 min, 1, 2, 3, 4, 6, 8, 12, 21, 24, 30, 36, 48, 60 and 72 hr after given PJ-68. Blood samples were centrifuged at 8,000 rpm for 6 min, the plasma was collected and stored at -80 °C until analysis. The plasma samples were analyzed by LC-MS/MS (liquid chromatography coupled with tandem mass spectrometry), 450  $\mu$ l internal

standard solution (5 µg/ml, acetonitrile) was added to 50 µl plasma samples to precipitate proteins. After centrifugation at 14,000 rpm, 4 °C for 5 min, the supernatant (200 µl) was introduced into the LC-MS/MS system. Detection was performed by using API 4000 mass spectrometer (Applied Biosystems) with TurboIonSpray source interface. The data was analyzed by Analyst software (Applied Biosystems, Foster City, CA) (5).

## References

1. Jin Y, et al. Ponatinib efficiently kills imatinib-resistant chronic eosinophilic leukemia cells harboring gatekeeper mutant T674I FIP1L1-PDGFRalpha: roles of Mcl-1 and beta-catenin. *Mol Cancer*. 2014;13:17.
2. Han B, et al. FOXC1 Activates Smoothed-Independent Hedgehog Signaling in Basal-like Breast Cancer. *Cell Rep*. 2015;13(5):1046-58.
3. Ye W, et al. Quantitative evaluation of the immunodeficiency of a mouse strain by tumor engraftments. *J Hematol Oncol*. 2015;8:59.
4. Song L, et al. TGF-beta induces miR-182 to sustain NF-kappaB activation in glioma subsets. *The Journal of clinical investigation*. 2012;122(10):3563-78.
5. Zhang Z, et al. GZD856, a novel potent PDGFRalpha/beta inhibitor, suppresses the growth and migration of lung cancer cells in vitro and in vivo. *Cancer Lett*. 2016;375(1):172-8.

**Supplemental Table 1. Characteristics of patients with chronic myelogenous leukemia**

| Patient No. | Gender/ Age (yr) | Disease stage | Sample | Date of diagnosis | Prior therapy       | Leukocyte count (10 <sup>9</sup> /L) | Blast (%) | BCR-ABL– positive  |
|-------------|------------------|---------------|--------|-------------------|---------------------|--------------------------------------|-----------|--------------------|
| 1           | M/39             | CP            | PB     | 1/2014            | Initial             | 558.71                               | 8%        | +                  |
| 2           | M/28             | CP            | BM     | 1/2014            | Initial             | 84.54                                | 7%        | +                  |
| 3           | F/10             | CP            | BM     | 1/2014            | Initial             | 670                                  | 5%        | +                  |
| 4           | F/25             | CP            | BM     | 2/2014            | Initial             | 339.95                               | 13%       | +                  |
| 5           | F/23             | CP            | PB     | 3/2014            | Initial             | 188.8                                | 4%        | +                  |
| 6           | M/55             | AP            | BM     | 2/2014            | Initial             | 152.8                                | 5%        | +                  |
| 7           | M/23             | CP            | BM     | 10/2014           | Initial             | 121.5                                | 3%        | +                  |
| 8           | M/22             | AP            | BM     | 4/2014            | Initial             | 216.5                                | 2.5%      | +                  |
| 9           | M/44             | CP            | PB     | 4/2014            | Initial             | 338.95                               | 5%        | +                  |
| 10          | F/51             | CP            | PB     | 4/2014            | Initial             | 241.39                               | 7%        | +                  |
| 11          | M/23             | CP            | BM     | 4/2014            | Initial             | 184.30                               | 1%        | +                  |
| 12          | M/49             | CP            | BM     | 5/2014            | Initial             | 67.62                                | 1%        | +                  |
| 13          | M/41             | CP            | BM     | 2/2013            | Imatinib            | 213.6                                | ND        | +                  |
| 14          | F/30             | CP            | BM     | 8/2014            | Initial             | 361.08                               | 3%        | +                  |
| 15          | M/31             | BP            | PB     | 8/2014            | Initial             | 809.49                               | 54%       | + (T315I mutation) |
| 16          | F/38             | CP            | PB     | 9/2014            | Initial             | 312.37                               | 3.65%     | +                  |
| 17          | F/18             | AP            | BM     | 9/2014            | Initial             | 49.46                                | 9%        | +                  |
| 18          | M/43             | CP            | BM     | 9/2014            | Initial             | 310.39                               | 8.5%      | +                  |
| 19          | M/40             | CP            | BM     | 10/2014           | Initial             | 483.85                               | 2%        | +                  |
| 20          | M/31             | BP            | PB     | 1/2016            | Imatinib resistance | 41                                   | 91%       | +                  |
| 21          | F/42             | BP            | BM     | 1/2016            | Initial             | 389                                  | ND        | +                  |
| 22          | M/39             | BP            | PB     | 12/2015           | Initial             | 229.5                                | ND        | +                  |

CP: chronic phase; AP: accelerated phase; BP: blast crisis phase; PB: peripheral blood;

BM: bone marrow; ND: not detected.

**Supplemental Table 2. Pharmacokinetics (mean  $\pm$  standard deviation) of PJ-68 in Sprague-Dawley (SD) rats.**

| <b>PJ-68</b>   | <b>T<sub>1/2</sub> (hr)</b> | <b>T<sub>max</sub> (hr)</b> | <b>C<sub>max</sub> (ng/ml)</b> | <b>AUC<sub>(0-t)</sub> (ng/ml*hr)</b> | <b>AUC<sub>(0-∞)</sub> (ng/ml*hr)</b> |
|----------------|-----------------------------|-----------------------------|--------------------------------|---------------------------------------|---------------------------------------|
| IV<br>1mg/kg   | 7.76 $\pm$ 1.15             | 0.08 $\pm$ 0.00             | 2788.5 $\pm$ 109.7             | 3496.3 $\pm$ 129.0                    | 3639.9 $\pm$ 145.5                    |
| PO 25<br>mg/kg | 7.75 $\pm$ 3.49             | 3.67 $\pm$ 0.58             | 1264.4 $\pm$ 28.4              | 9416.1 $\pm$ 32.7                     | 9575.7 $\pm$ 87.6                     |

Abbreviations: T<sub>1/2</sub>, half life; AUC, area under the plasma concentration–time curve; T<sub>max</sub>, time to reach peak concentration; C<sub>max</sub>, peak concentration.

**Supplemental Table 3. Primers for qRT-PCR**

| Genes                | Sense primer                   | Antisense primer               |
|----------------------|--------------------------------|--------------------------------|
| PRMT5                | 5'-CCTGTGGAGGTGAACACAGT-3'     | 5'-AGAGGATGGGAAACCATGAG-3'     |
| BCR-ABL              | 5'-TCCACTCAGCCACTGGATTAA-3'    | 5'-TGAGGCTCAAAGTCAGATGCTACT-3' |
| DVL3                 | 5'-CGCCTAGACGACTTCCACTT-3'     | 5'-CCGATGAAAGCATTAGGGAT-3'     |
| AXIN2                | 5'-TCAAGTGCAAACCTTTCGCCAACC-3' | 5'-TAGCCAGAACCTATGTGATAAGG-3'  |
| c-MYC                | 5'-CAGCGACTCTGAGGAGGAAC-3'     | 5'-TCGGTTGTTGCTGATCTGTC-3'     |
| LEF1                 | 5'-CGAATGTCGTTGCTGAGTGT-3'     | 5'-GCTGTCTTTCTTTCCGTGCT-3'     |
| CCND1                | 5'-GCTGTGCATCTACACCGACA-3'     | 5'-CCACTTGAGCTTGTTACCA-3'      |
| p15 <sup>INK4B</sup> | 5'-GAATGCGCGAGGAGAACAAG-3'     | 5'-CATCATCATGACCTGGATCGC-3'    |
| 18S                  | 5'-AAACGGCTACCACATCCAAG-3'     | 5'-CCTCCAATGGATCCTCGTTA-3'     |

**Primers for ChIP**

| Primer                                   | Sequence                    |
|------------------------------------------|-----------------------------|
| PRMT5-promoter-1 Sense                   | 5'-GGGTCTTCCAGCTTTCCTGC-3'  |
| PRMT5-promoter-1 Antisense               | 5'-TCACTGAATGGCTAGGCACAA-3' |
| PRMT5-promoter-2 Sense                   | 5'-GAAATTGGGGCTGACCTCCC-3'  |
| PRMT5-promoter-2 Antisense               | 5'-GAACCCTCCTACCACTCACC-3'  |
| BCR-ABL-promoter Sense                   | 5'-GAGCCAAGTGTTCCTGTTCCA-3' |
| BCR-ABL-promoter Antisense               | 5'-CCCGTCCCTGTGCCTTTT-3'    |
| miR-203-promoter Sense                   | 5'-ATCAGTCGCGGGACCTATGG-3'  |
| miR-203-promoter Antisense               | 5'-GGCGCCTTTTATGCGGC-3'     |
| p15 <sup>INK4B</sup> -promoter Sense     | 5'-AGGGCAGTGGTGAACATTCC-3'  |
| p15 <sup>INK4B</sup> -promoter Antisense | 5'-AAGCCTGCCCAAAGATGCTA-3'  |
| DVL3-promoter Sense                      | 5'-ACTACCTGCAACTGGACGC-3'   |
| DVL3-promoter Antisense                  | 5'-TCAACATGGCCCTTCAGTGT-3'  |

**Supplemental Table 4. Information of secondary antibodies for Western blot analysis.**

| Antibody               | Source                                 | Catalog number |
|------------------------|----------------------------------------|----------------|
| Goat-Anti-Mouse 800CW  | LICOR Corporate (Lincoln, NE)          | 926-32210      |
| Goat-Anti-Rabbit 800CW | LICOR Corporate                        | 926-32211      |
| Goat-Anti-Mouse 680RD  | LICOR Corporate                        | 926-68070      |
| Goat-Anti-Rabbit 680RD | LICOR Corporate                        | 926-68071      |
| HRP-anti-Mouse         | Thermo Fisher Scientific (Waltham, MA) | 31437          |
| HRP-anti-Rabbit        | Thermo Fisher Scientific               | 31463          |

**Supplemental Table 4. Information of antibodies for CML mice model.**

| Antibody (Clone)        | Source                      | Catalog number |
|-------------------------|-----------------------------|----------------|
| Lin-APC                 | BD Biosciences              | 51-9003632     |
| c-Kit-PE (2B8)          | eBioscience (San Diego, CA) | 12-1171-8      |
| c-Kit-APC-H7 (2B8)      | BD Biosciences              | 560185         |
| Sca-1-PE-CF594 (D7)     | BD Biosciences              | 562730         |
| CD135-PE-cy5 (A2F10)    | eBioscience                 | 15-1351-82     |
| CD150-PE-cy7 (mShad150) | eBioscience                 | 25-1502-82     |
| CD48-APC-cy7 (HM48-1)   | BD Biosciences              | 561242         |
| CD34-PE (RAM34)         | BD Biosciences              | 551387         |
| CD16/32-PE-Cy7 (93)     | eBioscience                 | 25-0161-82     |
| Mac-1(CD11b)-PE (M1/70) | BD Biosciences              | 553311         |
| Gr-1-APC (RB6-8C5)      | BD Biosciences              | 553129         |



**Information of antibodies for NSI mice.**

| Antibody (Clone)               | Source         | Catalog number |
|--------------------------------|----------------|----------------|
| CD45-FITC (HI30)               | eBioscience    | 11-0459-42     |
| CD34-FITC (4H11)               | eBioscience    | 11-0349-42     |
| CD33-PE-Cy7 (P67.6)            | BD Biosciences | 333952         |
| CD11B-PE (ICRF44)              | BD Biosciences | 555388         |
| CD19-APC (HIB19)               | BD Biosciences | 555415         |
| CD14-PerCP-Cy5.5 (M $\phi$ P9) | BD Biosciences | 562692         |
| CD3-Alexa Fluor 700 (UCHT1)    | BD Biosciences | 557943         |

# Supplemental Figure 8

## Figure 1B

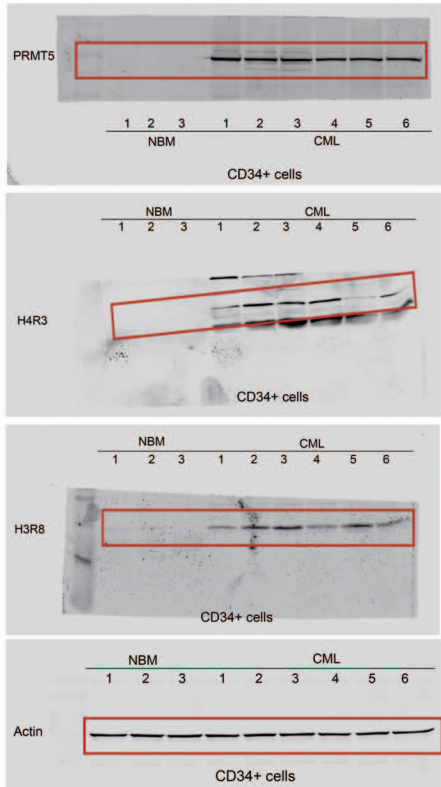

## Figure 1F

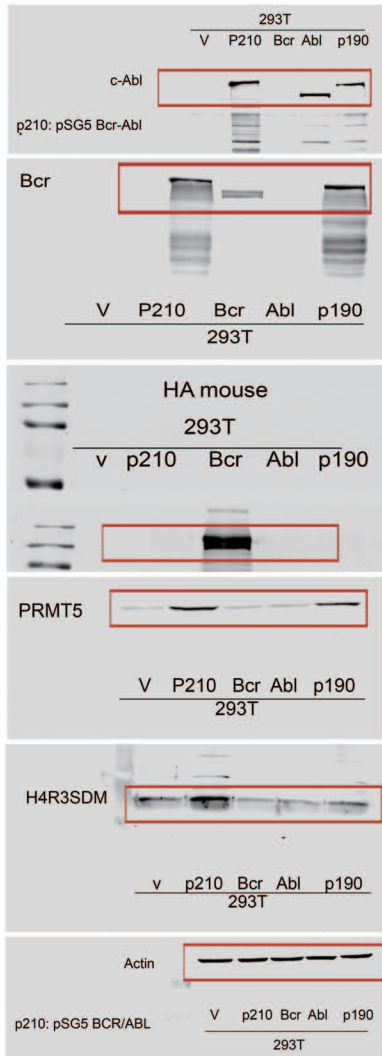

## Figure 1E

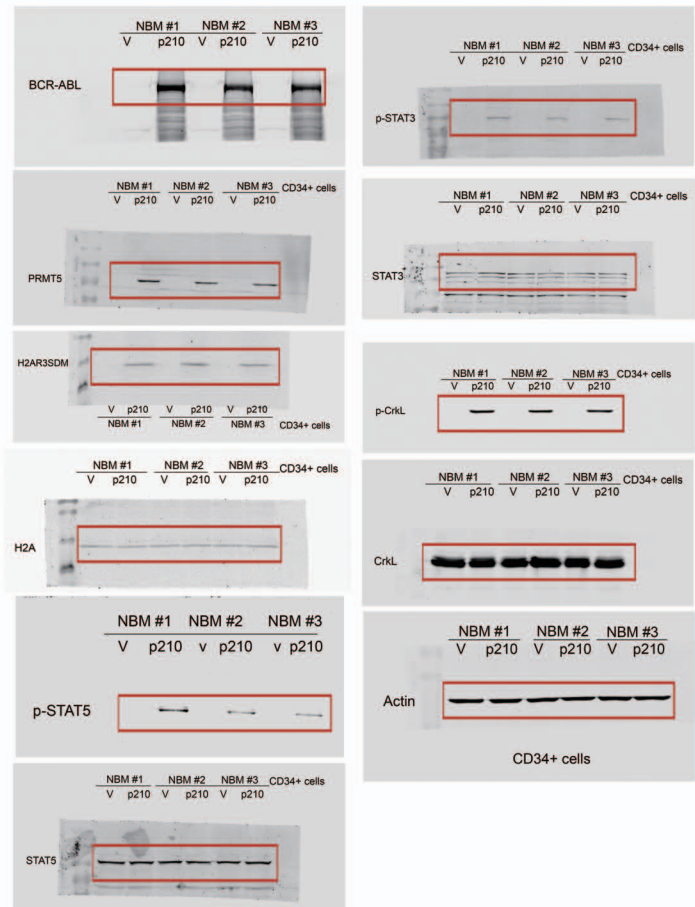

## Figure 1G

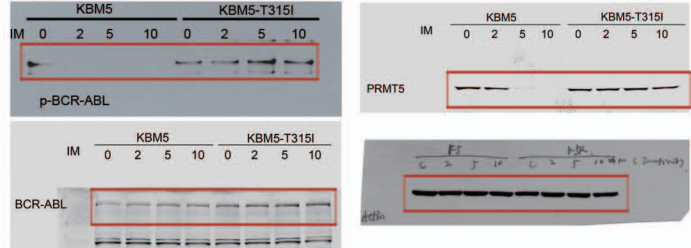

## Figure 1H

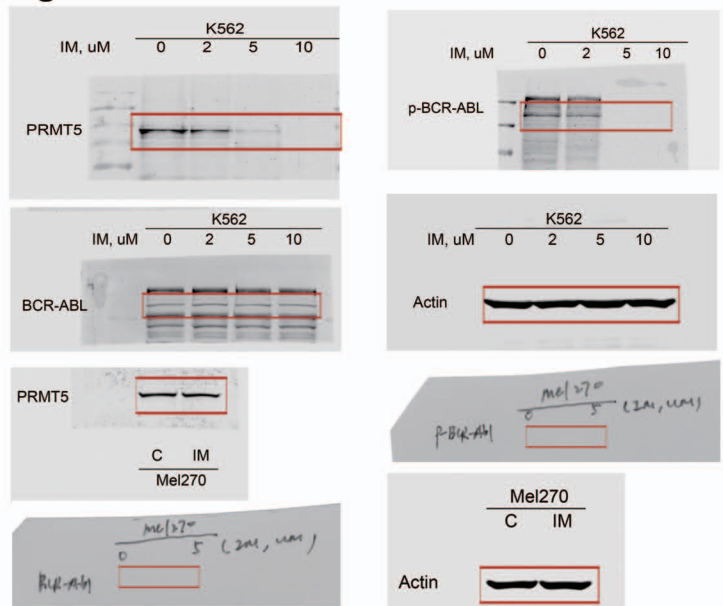

Supplemental Figure 8: Full unedited gel for Figure 1B E F G H, red boxes indicate images shown in the corresponding Figures.

# Supplemental Figure 8 Continued

**Figure 1J**

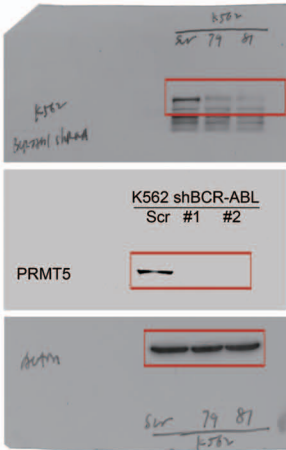

**Figure 1K**

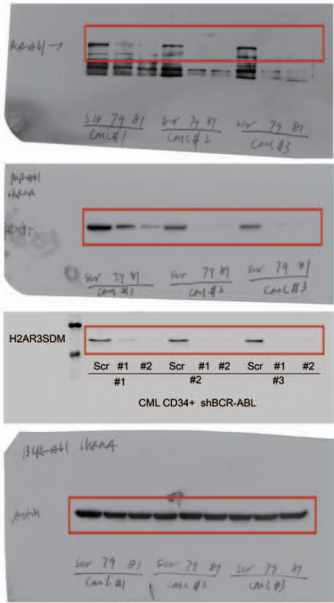

**Figure 1N**

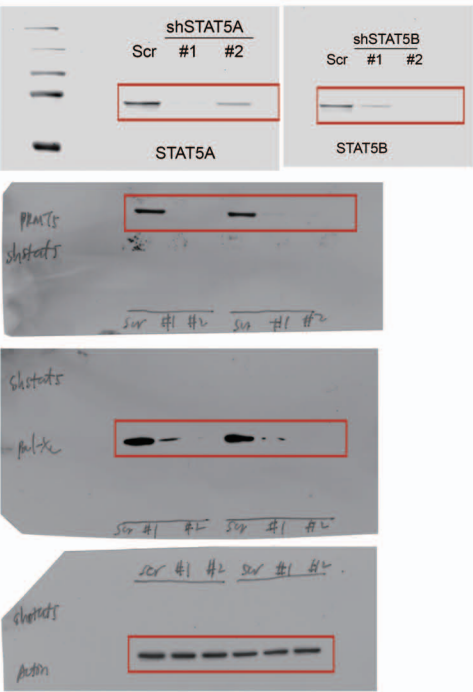

Supplemental Figure 8 continued: Full unedited gel for Figure 1 J K N, red boxes indicate images shown in the corresponding Figures.

# Supplemental Figure 9

## Figure 2A

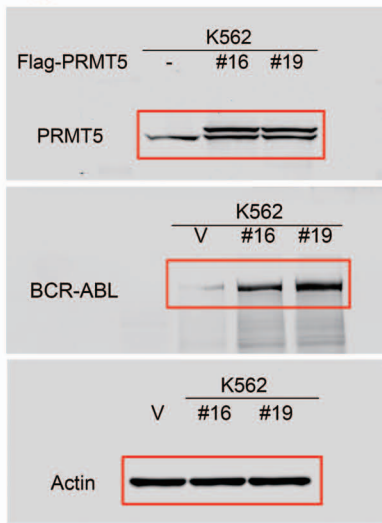

## Figure 2B

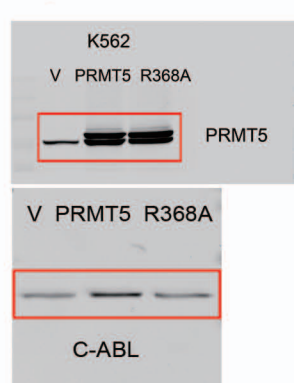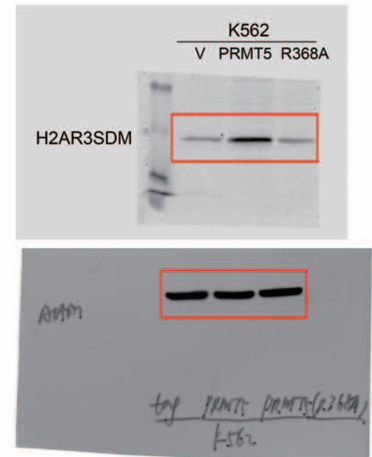

## Figure 2E

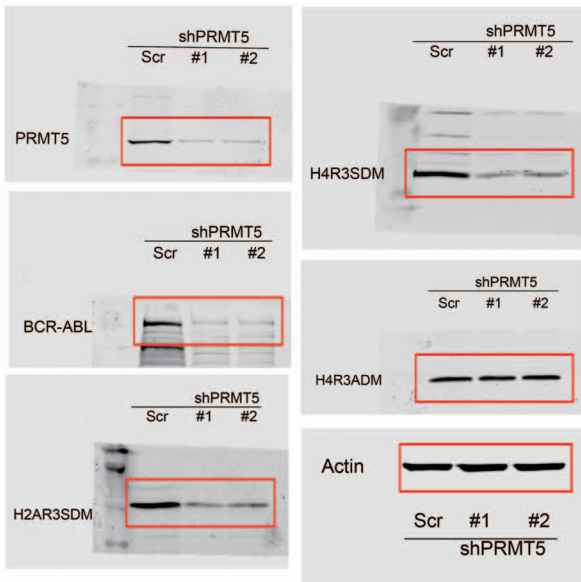

## Figure 2I

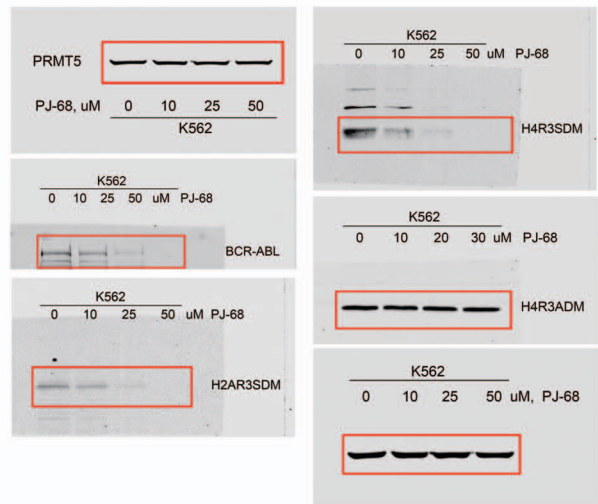

## Figure 2L

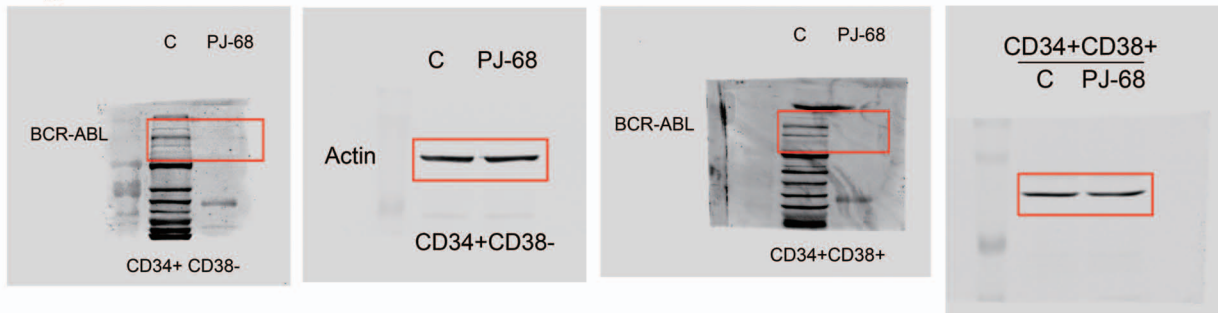

Supplemental Figure 9: Full unedited gel for Figure 2 A B E I L, red boxes indicate images shown in the corresponding Figures.

# Supplemental Figure 10

## Figure 3A

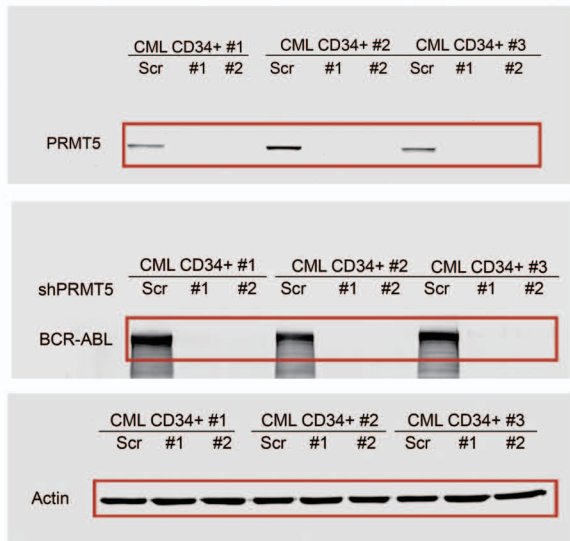

## Figure 3B

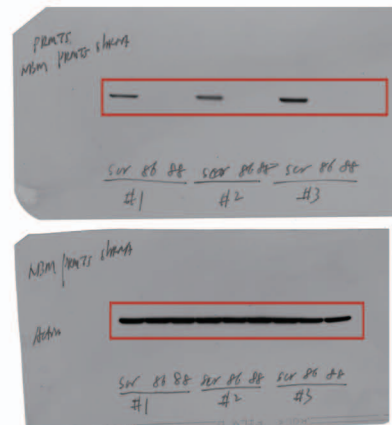

Supplemental Figure 10: Full unedited gel for Figure 3A and 3B, red boxes indicate images shown in the corresponding Figures.

# Supplemental Figure 11

## Figure 4B

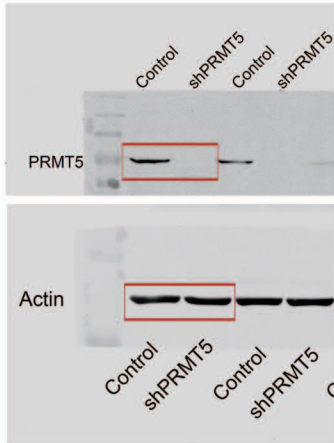

## Figure 5A and Supplemental 4A

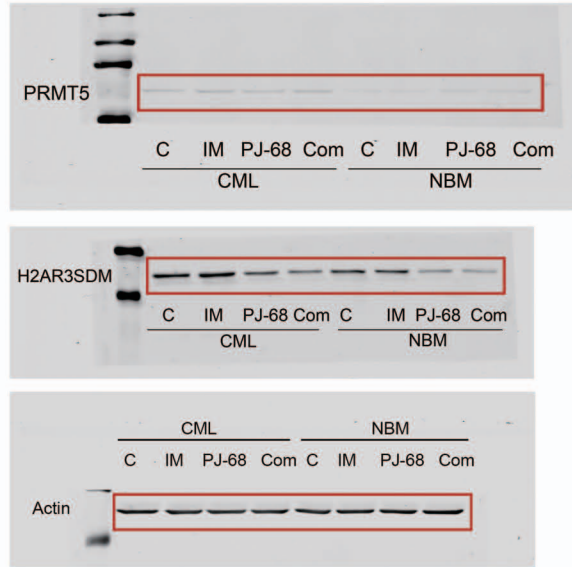

Supplemental Figure 11: Full unedited gel for Figure 4B, Figure 5A and Supplemental 4A, red boxes indicate images shown in the corresponding Figures.



# Supplemental Figure 12

## Figure 9A and 9B

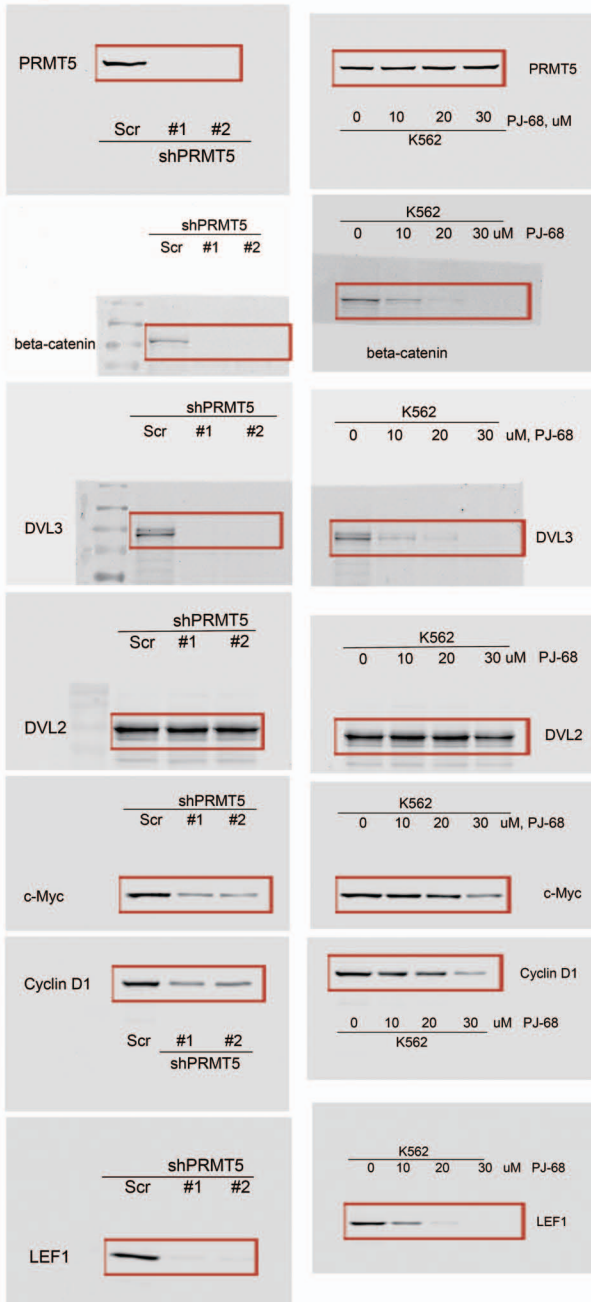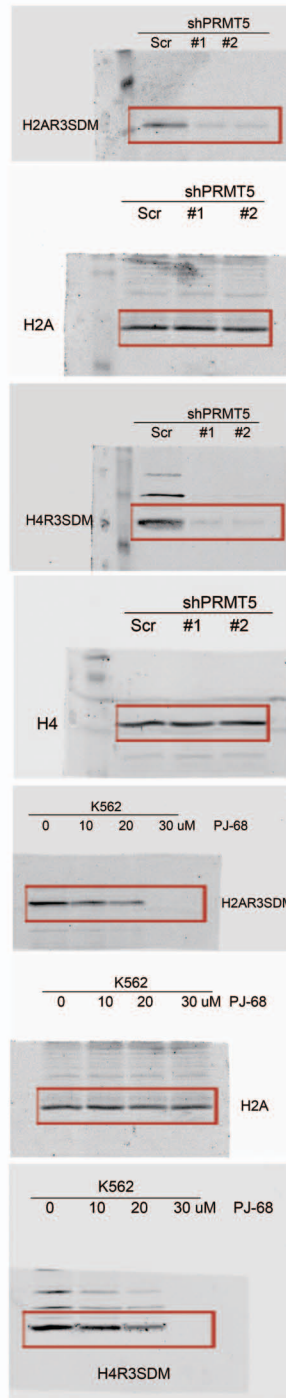

## Figure 9C

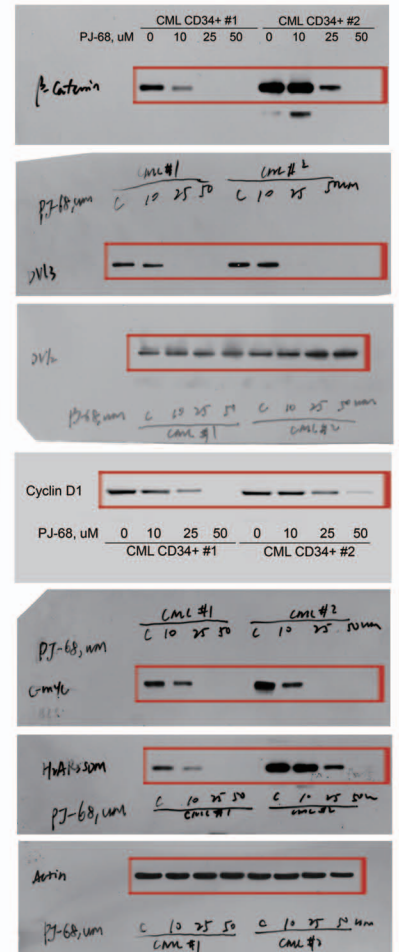

## Figure 9D

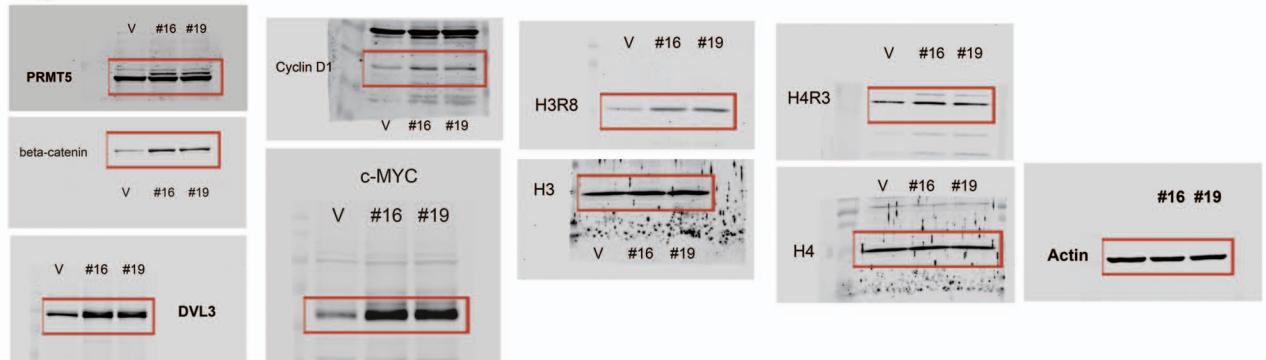

Supplemental Figure 12: Full unedited gel for Figure 9 A B C D, red boxes indicate images shown in the corresponding Figures.



# Supplemental Figure 12 Continued

## Figure 9G

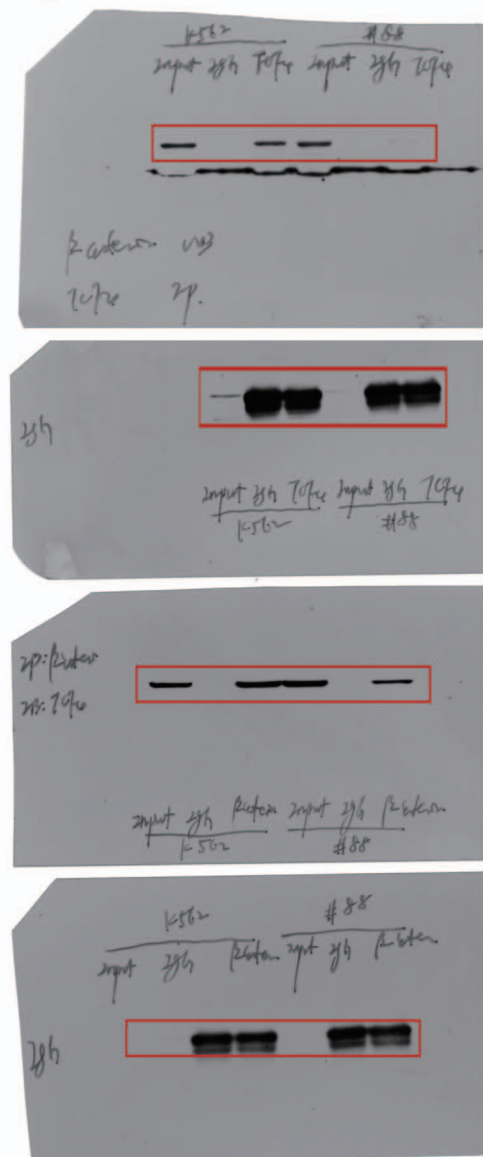

## Figure 9J

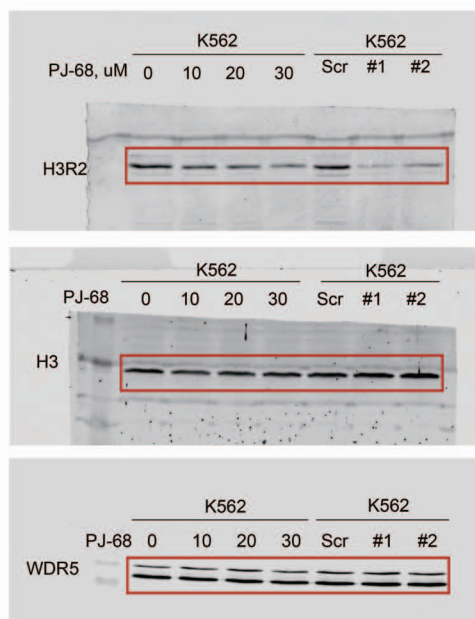

Supplemental Figure 12 continued: Full unedited gel for Figure 9G and 9J, red boxes indicate images shown in the corresponding Figures.

# Supplemental Figure 13

## Supplemental Figure 1C

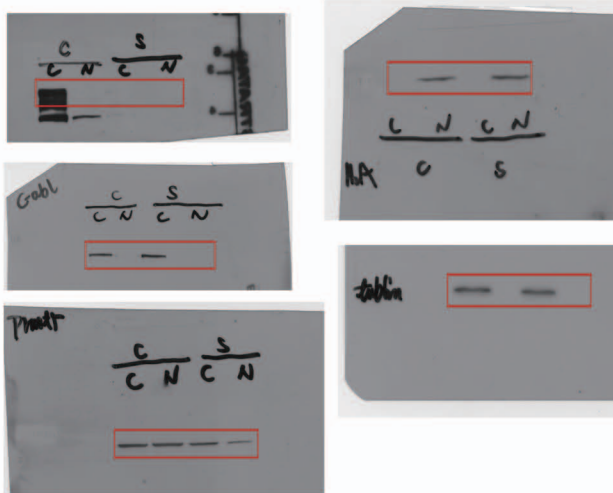

Supplemental Figure 13: Full unedited gel for Supplemental Figure 1C, red boxes indicate images shown in the corresponding Figures.

# Supplemental Figure 14

## Supplemental Figure 2A

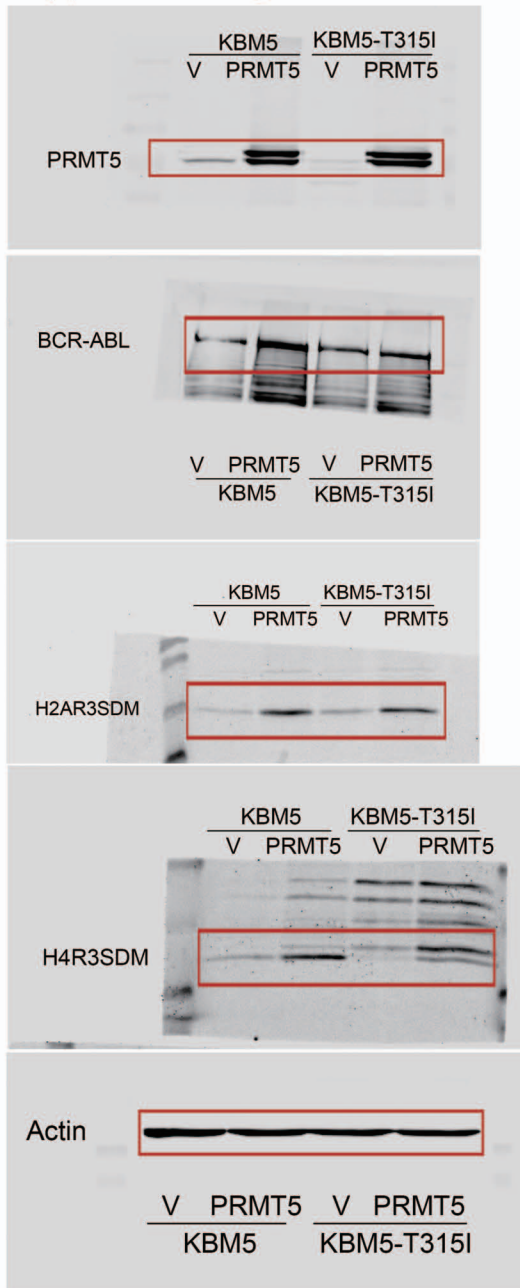

## Supplemental Figure 2C

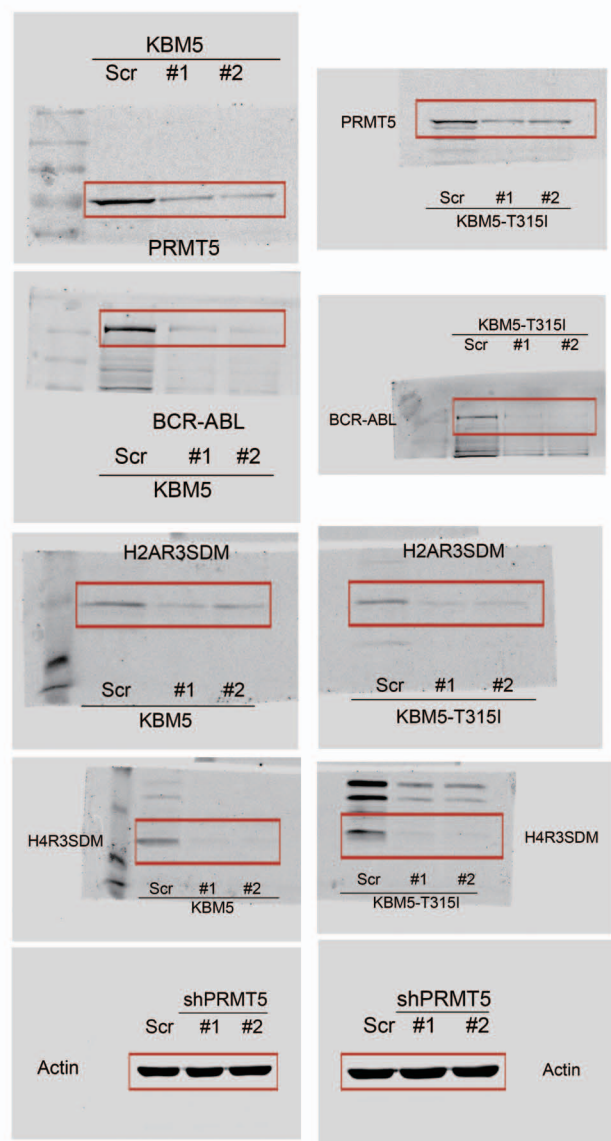

Supplemental Figure 14: Full unedited gel for Supplemental Figure 2A and 2C, red boxes indicate images shown in the corresponding Figures.

# Supplemental Figure 15

## Supplemental Figure 5A and 5B

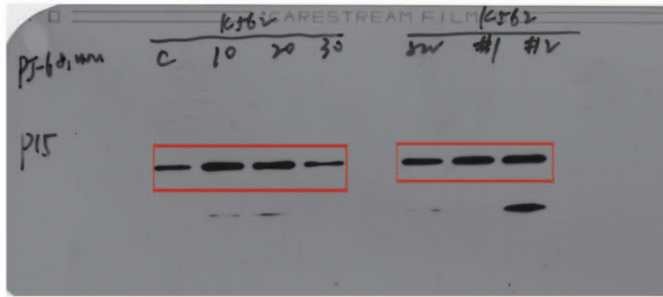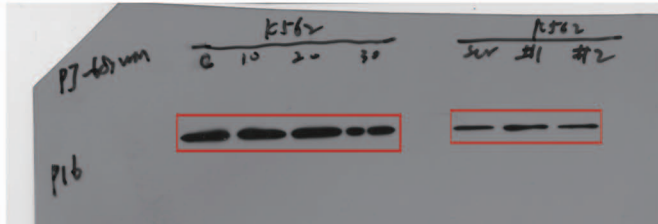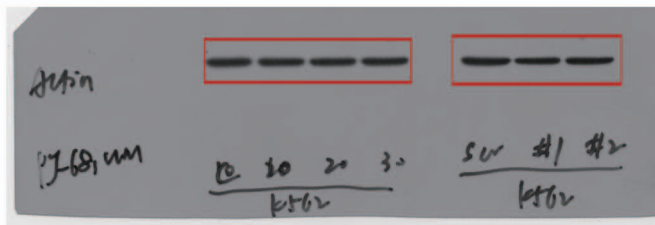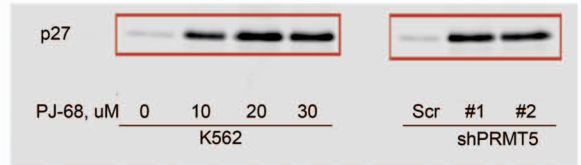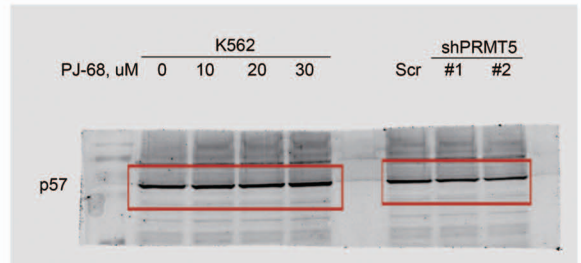

Supplemental Figure 15: Full unedited gel for Supplemental Figure 5A and 5B, red boxes indicate images shown in the corresponding Figures.

## Supplemental Figure 16

### Supplemental Figure 7 F

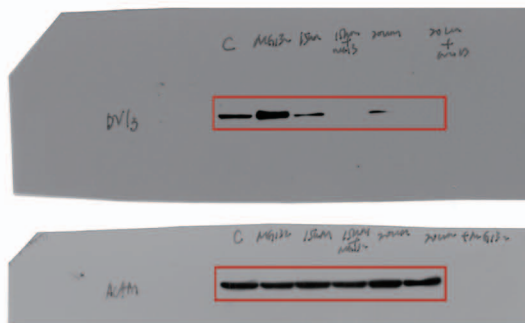

### Supplemental Figure 7G

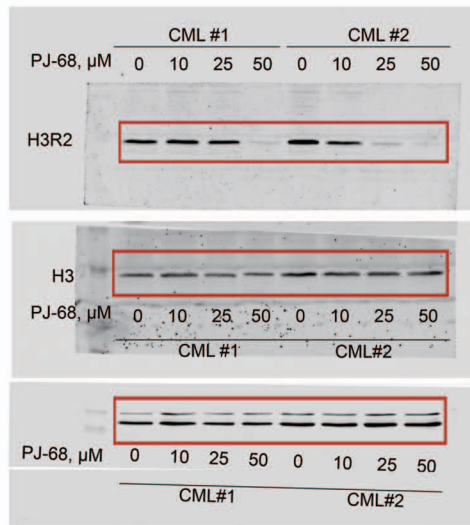

Supplemental Figure 16: Full unedited gel for Supplemental Figure 7F and 7G, red boxes indicate images shown in the corresponding Figures.
